# Supplementary material for: Investigation into the Microstructure and Hardness of Additively Manufactured (3D-Printed) Inconel 718 Alloy
Source: MDPI journal article supplement (doi:10.3390/ma16062383), 2023-03-16
Supplement: s1 [file s1]

## Supplementary materials

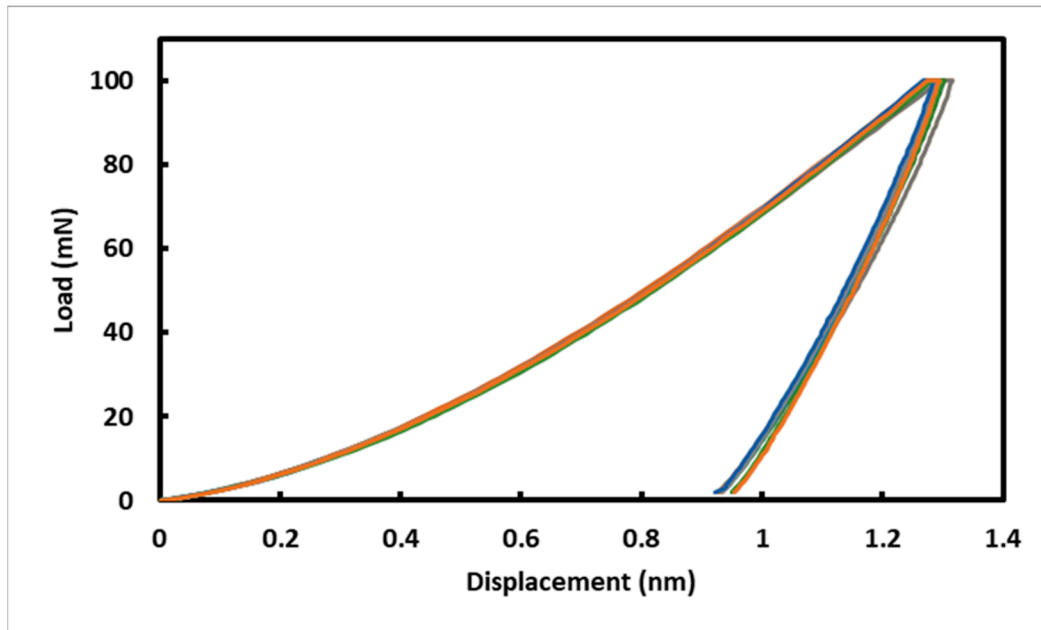

Fig. S1: Representative load-displacement graphs on the frontal planes of L-PBF processed Inconel 718 alloy with respect to the build direction (BD).

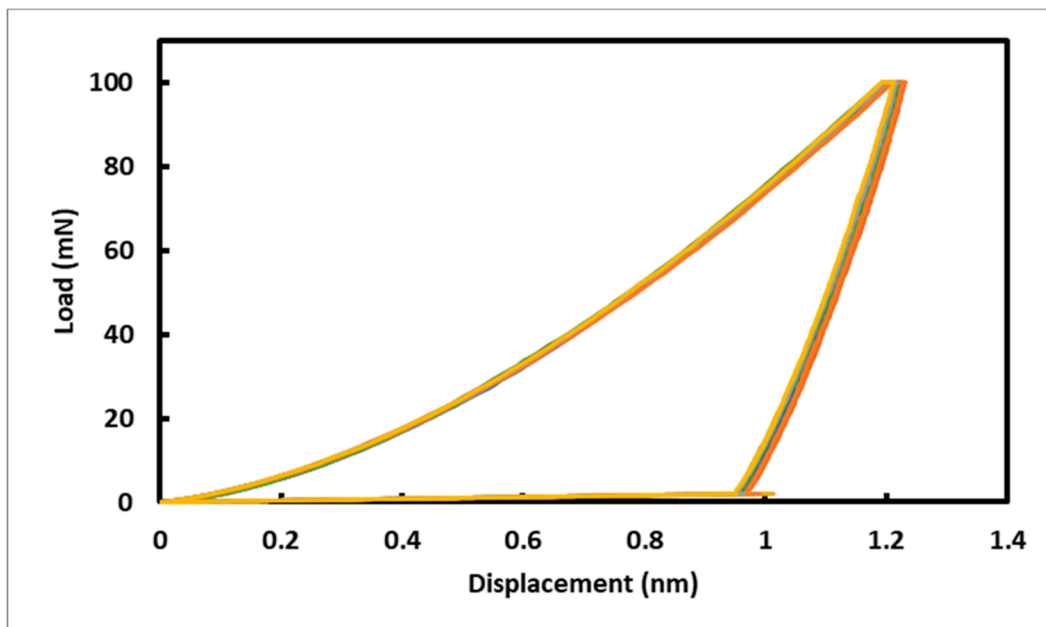

Fig. S2: Representative load-displacement graphs on the lateral planes of L-PBF processed Inconel 718 alloy with respect to the build direction (BD).

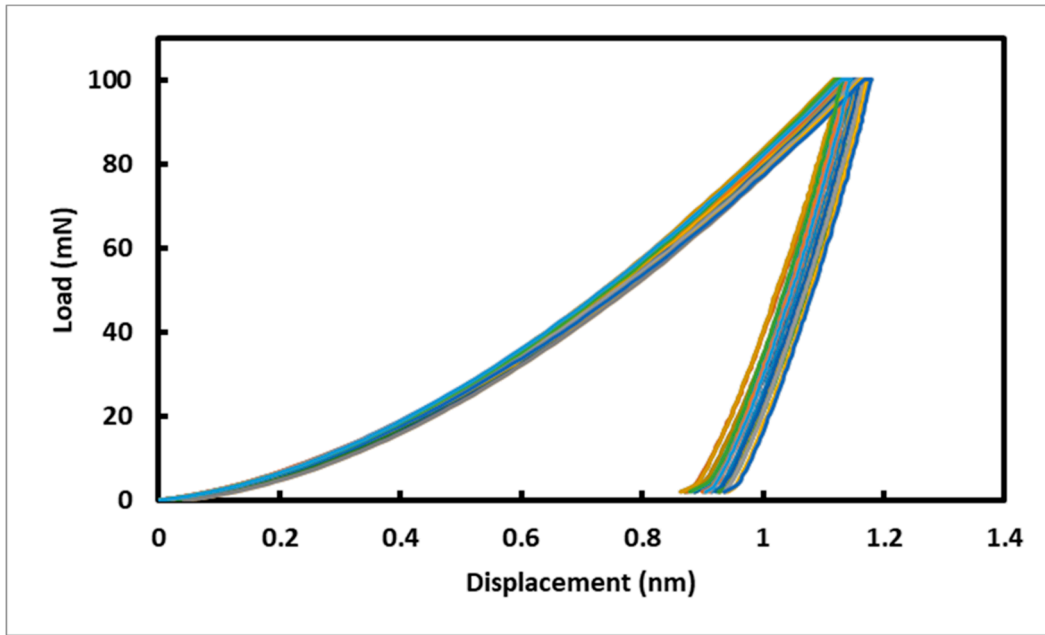

Fig. S3: Representative load-displacement graphs on the horizontal planes of the L-PBF processed Inconel 718 alloy with respect to the build direction (BD).

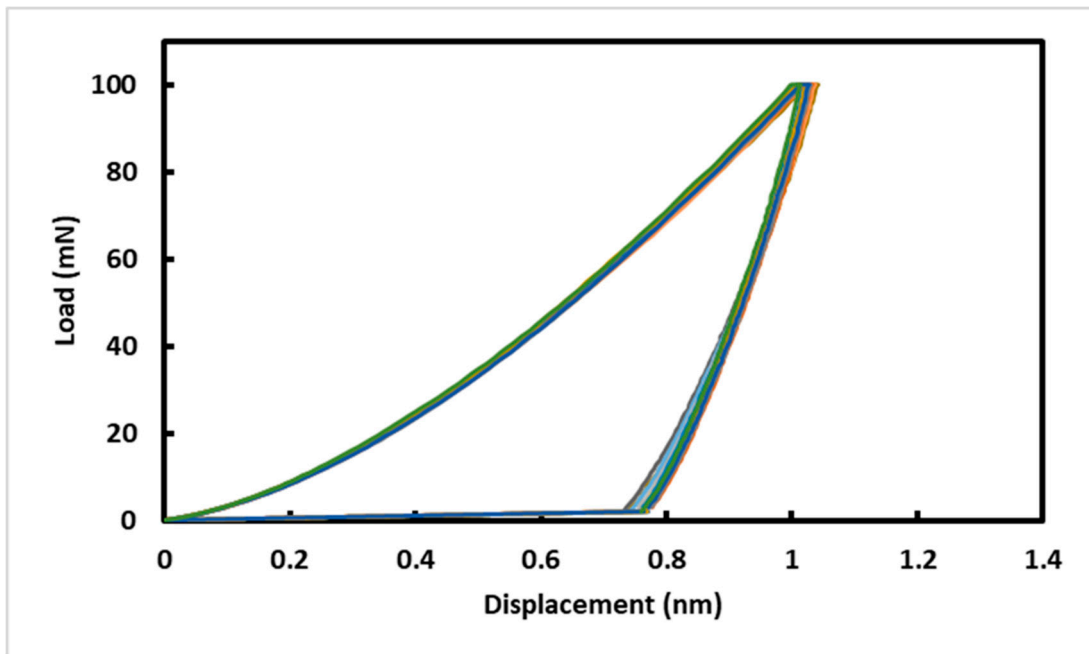

Fig. S4: Representative load-displacement graphs on the cast Al-12Si alloy.
